# Supplementary material for: Economic Evaluation of Clinical, Nutritional and Rehabilitation Interventions on Oropharyngeal Dysphagia after Stroke: A Systematic Review
Source: MDPI journal article supplement (doi:10.3390/nu15071714), 2023-03-31
Supplement: s1 [file s1]

## **Supplementary material**

### **JOURNAL**

Nutrients

### **TITLE**

Economic evaluation of clinical, nutritional and rehabilitation interventions on oropharyngeal dysphagia after stroke: a systematic review

### **AUTHORS**

1. Marin, Sergio. Academic degree: Pharmacist. Affiliations: 1. Gastrointestinal Physiology Laboratory, Hospital de Mataró, Universitat Autònoma de Barcelona, Mataró, Catalunya, ES. 2. Pharmacy Department, Hospital Universitari Germans Trias i Pujol, Badalona, Catalunya, ES
2. Ortega, Omar. Academic degree: Biologist, PhD in Medicine. Affiliations: 1. Gastrointestinal Physiology Laboratory, Hospital de Mataró, Universitat Autònoma de Barcelona, Mataró, Catalunya, ES. 2. Centro de Investigación Biomédica en Red de enfermedades hepáticas y digestivas (CIBERehd), Instituto de Salud Carlos III, Barcelona, Catalunya, ES.
3. Serra-Prat, Mateu. Academic degree: Medical Doctor, PhD in Medicine. Affiliations: 1. Research Unit, Consorci Sanitari del Maresme, Mataró, Catalunya, ES. 2. Centro de Investigación Biomédica en Red de enfermedades hepáticas y digestivas (CIBERehd), Instituto de Salud Carlos III, Barcelona, Catalunya, ES.

4. Valls, Ester. Academic degree: Pharmacist. Affiliations: 1. Pharmacy Department, Hospital Universitari Germans Trias i Pujol, Badalona, Catalunya, ES.
5. Pérez-Cordón, Laia. Academic degree: Pharmacist. Affiliations: 1. Pharmacy Department, Consorci Sanitari del Maresme, Hospital de Mataró, Mataró, Catalunya, ES.
6. Clavé, Pere. Academic degree: Professor, Medical Doctor, PhD in Medicine. Affiliations: 1. Gastrointestinal Physiology Laboratory, Hospital de Mataró, Universitat Autònoma de Barcelona, Mataró, Catalunya, ES. 2. Centro de Investigación Biomédica en Red de enfermedades hepáticas y digestivas (CIBERehd), Instituto de Salud Carlos III, Barcelona Catalunya, ES.

## Literature search

Search terms and MeSH terms used in the bibliographical search in MEDLINE using PubMed.

("Deglutition"[MeSH] OR "Deglutition Disorders"[MeSH] OR "Oropharynx/abnormalities"[MeSH] OR "Oropharynx/diagnosis"[MeSH] OR "Oropharynx/diagnostic imaging"[MeSH] OR "Oropharynx/pathology"[MeSH] OR "Oropharynx/pharmacology"[MeSH] OR "Oropharynx/physiopathology"[MeSH] OR "Oropharynx/therapy"[MeSH] OR Enteral tube feed\*/ OR Swallow[tiab] OR Dysphag\*[tiab] OR Deglut\*[tiab] OR Dysphagia[tw] OR Dysphag\*/ OR Dysphagia therapy/) AND ("Stroke"[MeSH] OR "Stroke Rehabilitation"[MeSH] OR "Brain Ischemia/ complications"[MeSH] OR "Cerebral Infarction"[MeSH] OR "Cerebral Hemorrhage"[MeSH] OR "Intracranial Embolism and Thrombosis"[MeSH] OR "Intracranial Hemorrhages"[MeSH] OR "Intracranial Arteriosclerosis"[MeSH] OR "Cerebrovascular Disorders"[MeSH] OR Stroke[tiab] OR Post stroke[tiab] OR Poststroke[tiab] OR Post-stroke[tiab] OR Cerebral Ischaemia[tiab] OR Brain Ischaemia[tiab] OR Brain infarction[tiab] OR Intracranial hemorrhage[tiab] OR Intracranial haemorrhage[tiab] OR Cerebral Hemorrhage[tiab] OR Cerebral Haemorrhage[tiab] OR Brain Hemorrhage[tiab] OR Brain Haemorrhage[tiab] OR Stroke discharge/ OR Post-stroke/) AND ("Economics"[MeSH] OR "Economics"[Subheading] OR "Models, Economic"[MeSH] OR "Health Resources"[MeSH] OR "Tertiary Care Centers/economics"[MeSH] OR "Rehabilitation Centers/economics"[MeSH] OR "Length of Stay/economics"[MeSH] OR "Medicare/economics"[MeSH] OR "Physical Therapy Modalities/economics"[MeSH] OR "Emergency Medical Services/economics"[MeSH] OR "Food, Formulated/economics"[MeSH] OR "Cerebrovascular Disorders/economics"[MeSH] OR Cost effectiveness analysis OR Cost utility analysis OR Cost minimization analysis OR Cost benefit analysis OR Cost[tw] OR Costs[tw] OR Quality-adjusted life years/ OR Cost utility[tiab] OR Cost-utility[tiab] OR Cost benefit[tiab] OR Cost-benefit[tiab] OR Cost minimization[tiab] OR Cost-minimization[tiab] OR Cost effectiveness[tiab] OR Cost-effectiveness[tiab])

Search terms used in the bibliographical search in Embase using Ovid.

("Deglutition" OR "Deglutition Disorders" OR "Dysphagia") AND ("Stroke" OR "Post stroke" OR "Poststroke" OR "Post-stroke" OR "Cerebral Ischaemia" OR "Brain Ischaemia" OR "Brain infarction" OR "Cerebral Hemorrhage" OR "Cerebral Haemorrhage" OR "Brain Hemorrhage" OR "Brain Haemorrhage") AND ("Economics" OR "Cost utility" OR "Cost minimization" OR "Cost benefit" OR "Cost" OR "Costs" OR "Cost-effectiveness")

Search terms used in the bibliographical search in the National Health Service Economic Evaluation Database (NHS-EED) using the Center for Reviews and Dissemination Database of the University of York.

((Dysphagia OR Deglutition Disorders OR Enteral tube feeding OR Dysphagia therapy OR Oropharynx abnormalities OR Oropharynx diagnosis OR Oropharynx diagnostic imaging OR Oropharynx pathology OR Oropharynx pharmacology OR Oropharynx physiopathology OR Oropharynx therapy)) and ((Economic evaluation:ZDT and Bibliographic:ZPS) OR (Economic evaluation:ZDT and Abstract:ZPS)) IN NHSEED

Search terms used in the bibliographical search in the Cost-Effectiveness Analysis (CEA) Registry database of the Center for the Evaluation of Value and Risk in Health.

(Dysphagia OR Deglutition Disorders OR Enteral tube feeding OR Dysphagia therapy OR Oropharynx abnormalities OR Oropharynx diagnosis OR Oropharynx diagnostic imaging OR Oropharynx pathology OR Oropharynx pharmacology OR Oropharynx physiopathology OR Oropharynx therapy)

No publication date and no language restrictions were imposed.

Unpublished material, protocols, books and abstracts were not included in this systematic review.

No other filters or limits were imposed.

**Reference:** Marin, S.; Serra-Prat, M.; Ortega, O.; Clavé, P. Economic evaluations of health care interventions in Oropharyngeal Dysphagia after Stroke: Protocol for a Systematic Review. *Syst Rev.* **2022**, *11*, 92. doi: 10.1186/s13643-022-01969-6.

**Table S1: Quality assessment adapted from the Consolidated Health Economic Evaluation Reporting Standards 2022 (CHEERS 2022) Statement Checklist**

| Section/topic                                                            | Elia<br>M<br>2008 | Beavan<br>J<br>2010 | Kotecki<br>S<br>2010 | Khiaocharoen<br>2012 | Wilson<br>RD 2012 | Svendsen<br>ML<br>2014 | Suksathien<br>R<br>2015 | Schwarz<br>M<br>2017 | Liu<br>ZY<br>2020 | Pelczarska<br>A<br>2020 |
|--------------------------------------------------------------------------|-------------------|---------------------|----------------------|----------------------|-------------------|------------------------|-------------------------|----------------------|-------------------|-------------------------|
| TITLE                                                                    |                   |                     |                      |                      |                   |                        |                         |                      |                   |                         |
| 1 Title                                                                  | Yes               | No                  | Yes                  | Yes                  | Yes               | Yes                    | No                      | No                   | No                | Yes                     |
| ABSTRACT                                                                 |                   |                     |                      |                      |                   |                        |                         |                      |                   |                         |
| 2 Abstract                                                               | Partly            | Partly              | Yes                  | Yes                  | Yes               | Yes                    | Yes                     | Partly               | Partly            | Yes                     |
| INTRODUCTION                                                             |                   |                     |                      |                      |                   |                        |                         |                      |                   |                         |
| 3 Background and objectives                                              | Yes               | Yes                 | Yes                  | Yes                  | Yes               | Yes                    | Yes                     | Yes                  | Partly            | Yes                     |
| METHODS                                                                  |                   |                     |                      |                      |                   |                        |                         |                      |                   |                         |
| 4 Health economic analysis plan                                          | No                | No                  | No                   | No                   | No                | No                     | No                      | No                   | No                | No                      |
| 5 Study population                                                       | Yes               | Yes                 | Yes                  | Yes                  | Yes               | Yes                    | Partly                  | Yes                  | Yes               | Yes                     |
| 6 Setting and location                                                   | Yes               | Yes                 | Yes                  | Yes                  | Yes               | Yes                    | Yes                     | Yes                  | Yes               | Yes                     |
| 7 Comparators                                                            | Yes               | Yes                 | Yes                  | Yes                  | Yes               | Yes                    | NA                      | Yes                  | Yes               | Yes                     |
| 8 Study perspective                                                      | Partly            | Yes                 | Yes                  | Yes                  | Yes               | Yes                    | No                      | Partly               | Yes               | Yes                     |
| 9 Time horizon                                                           | Yes               | Yes                 | Yes                  | Yes                  | Yes               | Partly                 | Yes                     | Yes                  | Yes               | Yes                     |
| 10 Discount rate                                                         | Yes               | No                  | NA                   | No                   | NA                | NA                     | NA                      | NA                   | NA                | NA                      |
| 11 Selection of outcomes                                                 | Yes               | Yes                 | Yes                  | Yes                  | Yes               | Partly                 | Yes                     | Partly               | Partly            | Yes                     |
| 12 Measurement of outcomes                                               | Yes               | Yes                 | Yes                  | Yes                  | Yes               | Yes                    | Yes                     | Partly               | Yes               | Yes                     |
| 13 Valuation of outcomes                                                 | Yes               | Yes                 | Yes                  | Yes                  | Yes               | Yes                    | Yes                     | Yes                  | Yes               | Yes                     |
| 14 Measurement and valuation of resources and costs                      | Yes               | Yes                 | Yes                  | Yes                  | Yes               | Yes                    | Partly                  | Partly               | Partly            | Yes                     |
| 15 Currency, price date, and conversion                                  | Yes               | Partly              | Partly               | Partly               | Yes               | Yes                    | Partly                  | Partly               | Partly            | Partly                  |
| 16 Rationale and description of model                                    | NA                | NA                  | NA                   | NA                   | Yes               | NA                     | NA                      | NA                   | NA                | Yes                     |
| 17 Analytics and assumptions                                             | Yes               | Yes                 | Partly               | Yes                  | Yes               | Yes                    | Partly                  | Partly               | Partly            | Yes                     |
| 18 Characterising heterogeneity                                          | Yes               | Yes                 | NA                   | Yes                  | Yes               | Yes                    | NA                      | Partly               | Partly            | Yes                     |
| 19 Characterising distributional effects                                 | Yes               | No                  | NA                   | No                   | Yes               | Partly                 | No                      | No                   | No                | Yes                     |
| 20 Characterising uncertainty                                            | Yes               | Partly              | No                   | Yes                  | Yes               | Partly                 | No                      | Partly               | No                | Yes                     |
| 21 Approach to engagement with patients and others affected by the study | No                | No                  | No                   | No                   | No                | No                     | No                      | No                   | No                | No                      |
| RESULTS                                                                  |                   |                     |                      |                      |                   |                        |                         |                      |                   |                         |
| 22 Study parameters                                                      | Yes               | Yes                 | Yes                  | Yes                  | Yes               | Yes                    | Yes                     | Yes                  | Yes               | Yes                     |
| 23 Summary of main results                                               | Yes               | Yes                 | Yes                  | Yes                  | Yes               | Yes                    | Yes                     | Yes                  | Partly            | Yes                     |
| 24 Effect of uncertainty                                                 | Yes               | Partly              | No                   | Yes                  | Yes               | Partly                 | No                      | Partly               | No                | Yes                     |
| 25 Effect of engagement with patients and others affected by the study   | No                | No                  | NA                   | No                   | No                | No                     | No                      | No                   | No                | No                      |
| DISCUSSION                                                               |                   |                     |                      |                      |                   |                        |                         |                      |                   |                         |
| 26 Discussion                                                            | Yes               | Yes                 | Partly               | Yes                  | Yes               | Yes                    | Yes                     | Yes                  | Yes               | Yes                     |
| OTHER RELEVANT INFORMATION                                               |                   |                     |                      |                      |                   |                        |                         |                      |                   |                         |
| 27 Source of funding                                                     | No                | Yes                 | Partly               | Yes                  | Yes               | Yes                    | No                      | Yes                  | Yes               | Yes                     |
| 28 Conflicts of interest                                                 | Yes               | Yes                 | Partly               | Yes                  | No                | Yes                    | Yes                     | Yes                  | Yes               | Yes                     |
